# Supplementary material for: Seabird species vary in behavioural response to drone census
Source: PubMed Central journal article supplement (PMC5738335; doi:10.1038/s41598-017-18202-3), 2017-12-20
Supplement: 41598_2017_18202_MOESM1_ESM.pdf [file 41598_2017_18202_MOESM1_ESM.pdf]

## **Seabirds species vary in behavioural response to drone census**

Émile Brisson-Curadeau\* <sup>1,2</sup>, David Bird<sup>1</sup>, Chantelle Burke<sup>3</sup>, David A Fifield<sup>4</sup>, Paul Pace<sup>5</sup>, Richard B Sherley<sup>6</sup> and Kyle H Elliott<sup>1</sup>

<sup>2</sup>Corresponding author. Email: [emile.brissoncuradeau@mcgill.ca](mailto:emile.brissoncuradeau@mcgill.ca)

Phone: 1-514-553-6910

<sup>1</sup>Department of Natural Resource Sciences, McGill University, Ste-Anne-de-Bellevue, Québec, Canada

<sup>3</sup>Cognitive and Behavioral Ecology Program, Psychology Department, Memorial University, St. John's, NL, Canada

<sup>4</sup>Wildlife Research Division, Environment Canada, 6 Bruce Street, Mount Pearl NL, Canada

<sup>5</sup>13 Erinlea Court, Ottawa, ON K2E 7C8, Canada

<sup>6</sup>Environment and Sustainability Institute, University of Exeter, Penryn Campus, Penryn, Cornwall, TR10 9FE, UK

## Supplementary Information

**Table S1:** Structure of 30 linear models explaining the ratio of thick-billed murre flushing from a plot in response to the UAV. The 6 explanatory variables are: 1) habituation over a short period of time, as the number of previous flights on the same day of the on-going observation 2) take-off distance from the plot in meters, 3) in-flight distance from the plot in meters, 4) the ratio of non-breeding birds in the plot (continuous), 5) the angle of approach (from above or from below). 6) Interaction from effects 1 and 3, 7) Interaction from effects 3 and 4. Models were built based on the relevant biological explanations.

|            | (1)<br>Habituation<br>over a short<br>period | (2)<br>Take-off<br>distance<br>from the<br>plot | (3)<br>In-flight<br>distance<br>from the<br>plot | (4)<br>Ratio of<br>non-<br>breeding<br>birds in<br>the plot | (5)<br>The angle<br>of<br>approach | (6)<br>Interaction:<br>Effects (1)<br>and (3) | (7)<br>Interaction:<br>Effects (4)<br>and (3) |
|------------|----------------------------------------------|-------------------------------------------------|--------------------------------------------------|-------------------------------------------------------------|------------------------------------|-----------------------------------------------|-----------------------------------------------|
| <b>m1</b>  |                                              | x                                               |                                                  |                                                             |                                    |                                               |                                               |
| <b>m2</b>  |                                              | x                                               | x                                                |                                                             |                                    |                                               |                                               |
| <b>m3</b>  |                                              | x                                               | x                                                | x                                                           |                                    |                                               |                                               |
| <b>m4</b>  |                                              |                                                 | x                                                |                                                             |                                    |                                               |                                               |
| <b>m5</b>  |                                              |                                                 | x                                                | x                                                           |                                    |                                               |                                               |
| <b>m6</b>  |                                              |                                                 |                                                  | x                                                           |                                    |                                               |                                               |
| <b>m7</b>  |                                              |                                                 |                                                  |                                                             |                                    |                                               |                                               |
| <b>m8</b>  | x                                            | x                                               | x                                                | x                                                           |                                    |                                               |                                               |
| <b>m9</b>  |                                              | x                                               |                                                  | x                                                           |                                    |                                               |                                               |
| <b>m10</b> | x                                            | x                                               |                                                  | x                                                           |                                    |                                               |                                               |
| <b>m11</b> |                                              | x                                               |                                                  |                                                             | x                                  |                                               |                                               |
| <b>m12</b> |                                              | x                                               | x                                                |                                                             | x                                  |                                               |                                               |
| <b>m13</b> |                                              | x                                               | x                                                | x                                                           | x                                  |                                               |                                               |

|            |   |   |   |   |   |   |   |
|------------|---|---|---|---|---|---|---|
| <b>m14</b> |   |   | X |   | X |   |   |
| <b>m15</b> |   |   | X | X | X |   |   |
| <b>m16</b> |   |   |   | X | X |   |   |
| <b>m17</b> |   |   |   |   | X |   |   |
| <b>m18</b> | X | X | X | X | X |   |   |
| <b>m19</b> |   | X |   | X | X |   |   |
| <b>m20</b> | X | X |   | X | X |   |   |
| <b>m21</b> | X | X | X | X | X |   | X |
| <b>m22</b> |   |   | X | X | X |   | X |
| <b>m23</b> |   | X | X | X | X |   | X |
| <b>m24</b> | X | X | X | X |   |   | X |
| <b>m25</b> |   |   | X | X |   |   | X |
| <b>m26</b> |   | X | X | X |   |   | X |
| <b>m27</b> | X | X | X | X |   | X |   |
| <b>m28</b> | X | X | X | X | X | X |   |
| <b>m29</b> | X | X | X | X |   | X | X |
| <b>m30</b> | X | X | X | X | X | X | X |

**Table S2:** AICc table for results of all models explaining the ratio of thick-billed murre flushing from a plot in response to the UAV

|     | <b>K</b> | <b>AICc</b> | <b>ΔAICc</b> | <b>AICc Wt</b> | <b>Cumulative</b> | <b>Log</b> |
|-----|----------|-------------|--------------|----------------|-------------------|------------|
| m3  | 6        | 169.66      | 0.00         | 0.25           | 0.25              | -78.12     |
| m9  | 5        | 170.22      | 0.57         | 0.19           | 0.44              | -79.61     |
| m8  | 7        | 171.41      | 1.76         | 0.10           | 0.54              | -77.74     |
| m13 | 7        | 171.73      | 2.07         | 0.09           | 0.63              | -77.90     |
| m26 | 7        | 172.15      | 2.49         | 0.07           | 0.70              | -78.11     |
| m19 | 6        | 172.21      | 2.55         | 0.07           | 0.77              | -79.39     |
| m10 | 6        | 172.55      | 2.89         | 0.06           | 0.83              | -79.56     |
| m27 | 8        | 173.57      | 3.91         | 0.04           | 0.86              | -77.52     |
| m18 | 8        | 173.70      | 4.05         | 0.03           | 0.89              | -77.59     |
| m24 | 8        | 173.99      | 4.33         | 0.03           | 0.92              | -77.73     |
| m23 | 8        | 174.33      | 4.67         | 0.02           | 0.95              | -77.90     |
| m20 | 7        | 174.66      | 5.01         | 0.02           | 0.97              | -79.37     |
| m28 | 9        | 175.89      | 6.23         | 0.01           | 0.98              | -77.34     |
| m29 | 9        | 176.26      | 6.60         | 0.01           | 0.99              | -77.52     |
| m21 | 9        | 176.39      | 6.73         | 0.01           | 0.99              | -77.59     |
| m30 | 10       | 178.66      | 9.01         | 0.00           | 1.00              | -77.33     |
| m2  | 5        | 180.13      | 10.47        | 0.00           | 1.00              | -84.56     |
| m12 | 6        | 181.71      | 12.06        | 0.00           | 1.00              | -84.15     |
| m1  | 4        | 182.32      | 12.67        | 0.00           | 1.00              | -86.83     |
| m11 | 5        | 183.44      | 13.79        | 0.00           | 1.00              | -86.22     |
| m16 | 5        | 189.93      | 20.27        | 0.00           | 1.00              | -89.47     |
| m15 | 6        | 191.67      | 22.01        | 0.00           | 1.00              | -89.12     |
| m22 | 7        | 194.16      | 24.51        | 0.00           | 1.00              | -89.12     |
| m17 | 4        | 197.29      | 27.63        | 0.00           | 1.00              | -94.32     |
| m14 | 5        | 198.94      | 29.28        | 0.00           | 1.00              | -93.97     |
| m6  | 4        | 204.19      | 34.53        | 0.00           | 1.00              | -97.77     |
| m5  | 5        | 205.92      | 36.26        | 0.00           | 1.00              | -97.46     |
| m25 | 6        | 206.83      | 37.17        | 0.00           | 1.00              | -96.70     |
| m7  | 3        | 213.73      | 44.07        | 0.00           | 1.00              | -103.67    |
| m4  | 4        | 215.74      | 46.08        | 0.00           | 1.00              | -103.54    |
